# Supplementary material
Source: PubMed Central journal article supplement (PMC2234113)

**a**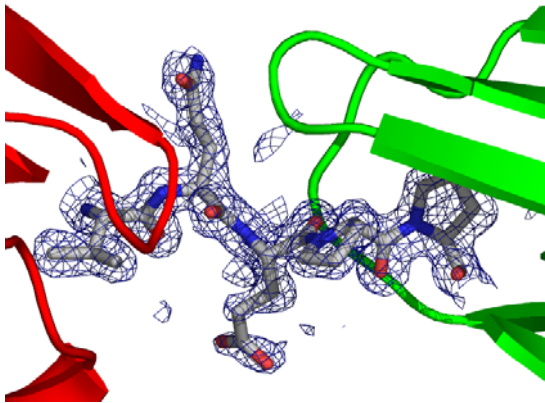**b**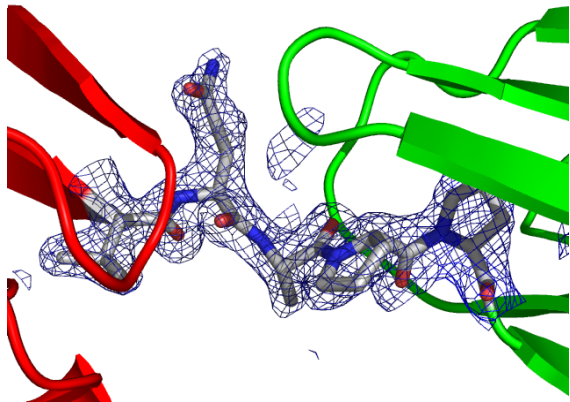

Supplement: pnas_0707163105_1.pdf [file pnas_0707163105_1.pdf]

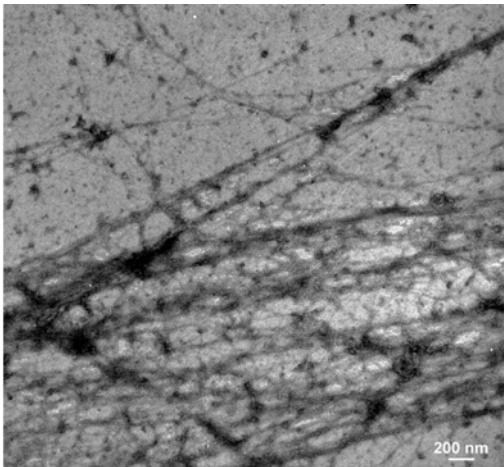

Supplement: pnas_0707163105_2.pdf [file pnas_0707163105_2.pdf]
